# Supplementary material for: La dimensión ética en la profesión del ingeniero técnico en topografía: el caso de España en el siglo XXI
Source: Royal Society of Chemistry journal article supplement (doi:10.1039/b607296h), 2011-02-01

**Supplementary material.** Mass change/potential plots recorded at the EQCM for solutions of: a) 0.50 mM  $\text{CuSO}_4 \cdot 5\text{H}_2\text{O}$  plus 0.15 M  $\text{NaClO}_4$  at pH 2.0, and b) 0.50 mM  $4[\text{Cu}_2\text{H}_2\text{L}^1](\text{ClO}_4)_2$  in 0.15 M  $\text{NaCl}$  at pH 7.5. Potential cycling between +450 and -1050 mV; potential scan rate 100 mV/s.

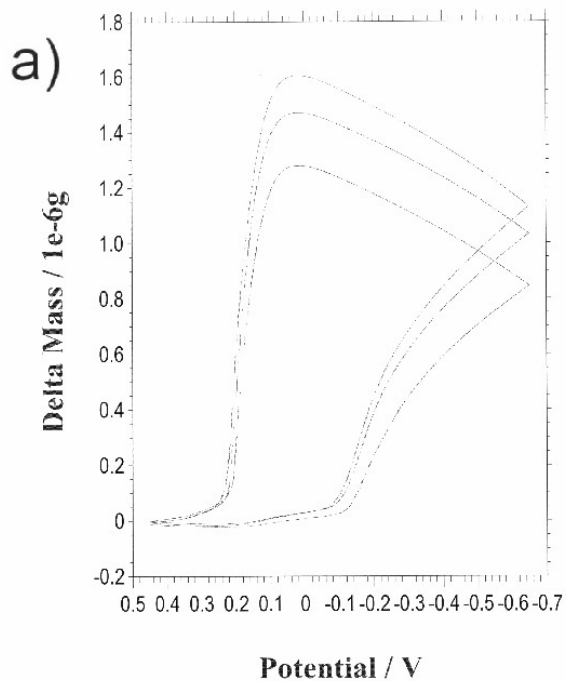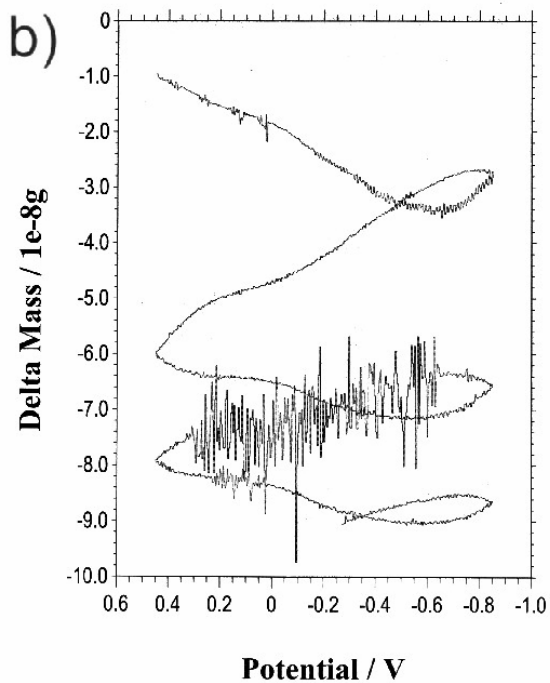

**Supplementary material.** SQWVs at GCE for a 0.45 mM solution of  $5[\text{Cu}_2\text{H}_{-1}\text{L}^2](\text{H}_2\text{O})_2(\text{ClO}_4)_3$  in 0.15 M NaCl at 299 (A), 315 (B), and 328 K (C). Potential step increment 4 mV; square wave amplitude 25 mV; frequency 15 Hz.

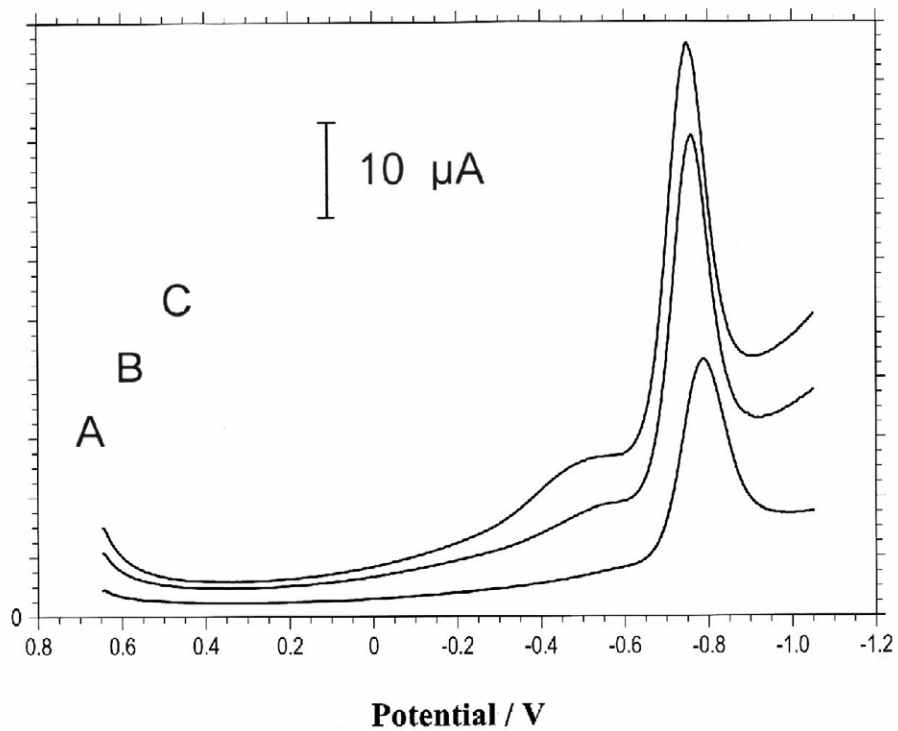

Supplement: b607296h.pdf [file b607296h.pdf]
